# Supplementary material
Source: Elsevier journal article supplement (https://www.sciencedirect.com/science/article/pii/S2605153221000856)
Supplement: mmc1 [file S2605153221000856:mmc1.docx]

**SUPPLEMENTARY DATA**

**TABLE OF CONTENTS**

**Table 1 of the supplementary data.** TRIPOD Checklist: Prediction Model Development.

**Table 2A of the supplementary data.** Factors associated with isolated ambulatory hypertension in normotensive adults aged 65 and over, based on multiple logistic regression modeling without interaction terms.

**Table 2B of the supplementary data**. Factors associated with isolated ambulatory hypertension in normotensive adults aged 65 and over, based on multiple logistic regression modeling including the interaction term “group bmi*sex”.

**Table 2C of the supplementary data.** Factors associated with isolated ambulatory hypertension in normotensive adults aged 65 and over, based on multiple logistic regression modeling including interaction terms “group bmi*sex” and “group bmi*age80”.

**Table 2D of the supplementary data.** Factors associated with isolated ambulatory hypertension in normotensive adults aged 65 and over, based on multiple logistic regression modeling including interaction terms “groups bm i*sex”, “groups bmi*age80”, “bp 1st measurement*sex”, “bp 1st measurement*age”, bp 2nd and 3rd measurement*sex” and “bp 2nd and 3rd measurement*age”.

**Figure 1 of the supplementary data**. Area under the receiving operating curve from the score to screen for isolated ambulatory hypertension in normotensive subjects aged 65 and over.

**Figure 2 of the supplementary data.** Area under the receiver operating characteristic (roc) curve from a multivariable logistic regression model excluding the variable “mean 2nd and 3rd casual blood pressure measurement”, and including sex, age > 80, body mass index, and 1st casual blood pressure.

**Figure 3 of the supplementary data**. Area under the receiver operating characteristic (roc) curve from a logistic regression model including only the variable “mean 2nd and 3rd casual blood pressure measurement”.

**Figure 4 of the supplementary data.** Area under the receiver operating characteristic (roc) curve from a multivariable logistic regression model with all the variables (except sex) modeled as continuous.

**Figure 5 of the supplementary data.** Probability of having isolated ambulatory hypertension based on the score as estimated from the multiple logistic regression model in the external validation sample.
